# Supplementary material for: Sulphated TiO2 Reduced by Ammonia and Hydrogen as an Excellent Photocatalyst for Bacteria Inactivation
Source: MDPI journal article supplement (doi:10.3390/ma17010066), 2023-12-22
Supplement: s1 [file s1]

**Supplementary material for:**

# **Sulphated TiO<sub>2</sub> Reduced by Ammonia and Hydrogen as An Excellent Photocatalyst for Bacteria Inactivation**

**Piotr Rychtowski<sup>1\*</sup>, Oliwia Paszkiewicz<sup>2</sup>, Agata Markowska-Szczupak<sup>2</sup>, Grzegorz Leniec<sup>3</sup> and Beata Tryba<sup>1</sup>**

<sup>1</sup> Department of Catalytic and Sorbent Materials Engineering, Faculty of Chemical Technology and Engineering, West Pomeranian University of Technology in Szczecin, Pułaskiego 10, 70-322 Szczecin, Poland.

<sup>2</sup> Department of Chemical and Process Engineering, West Pomeranian University of Technology, Piastów 42, 71-065 Szczecin, Poland.

<sup>3</sup> Department of Nanomaterials Physicochemistry, Faculty of Chemical Technology and Engineering, West Pomeranian University of Technology, Szczecin, Piastów Ave. 42, 71-065 Szczecin, Poland.

\* Correspondence: [piotr.rychtowski@zut.edu.pl](mailto:piotr.rychtowski@zut.edu.pl)

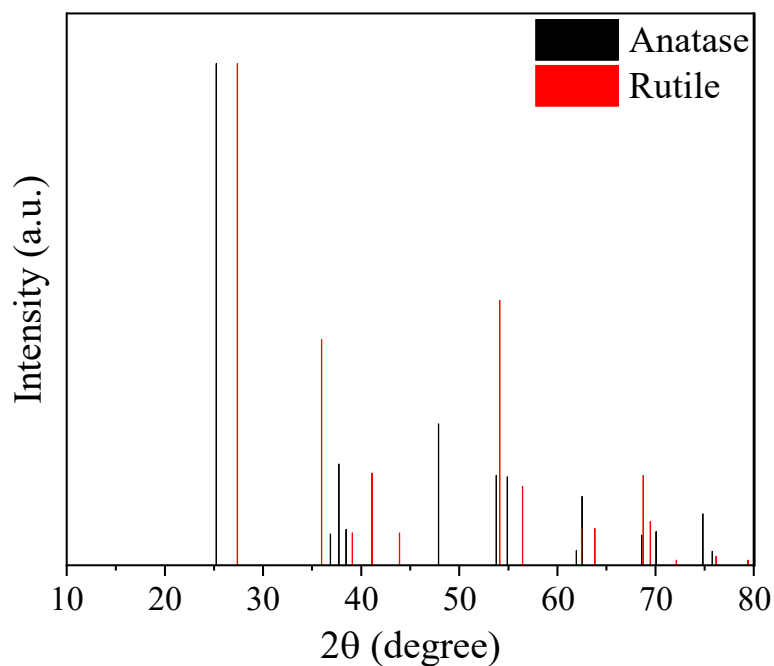

**Figure S1.** XRD reference patterns of anatase (black pattern) and rutile (red pattern)

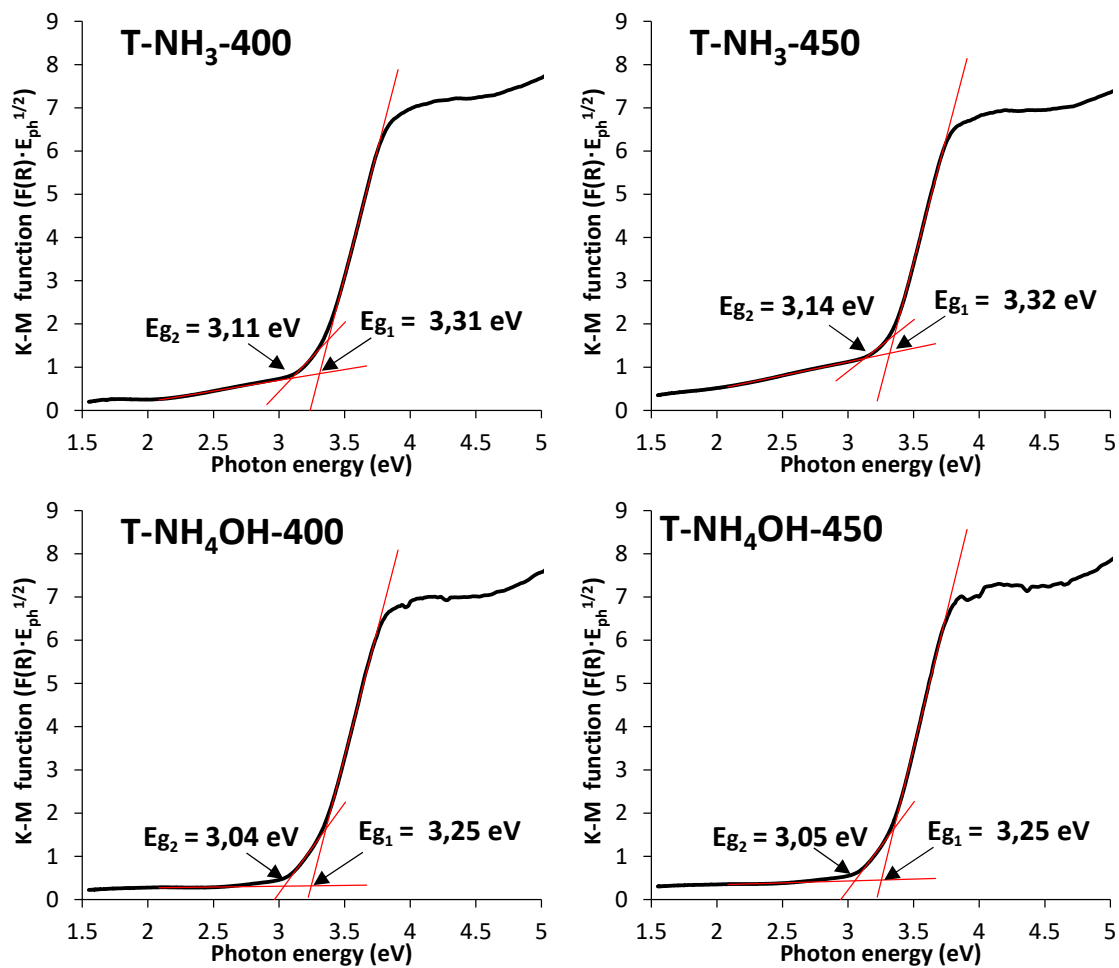

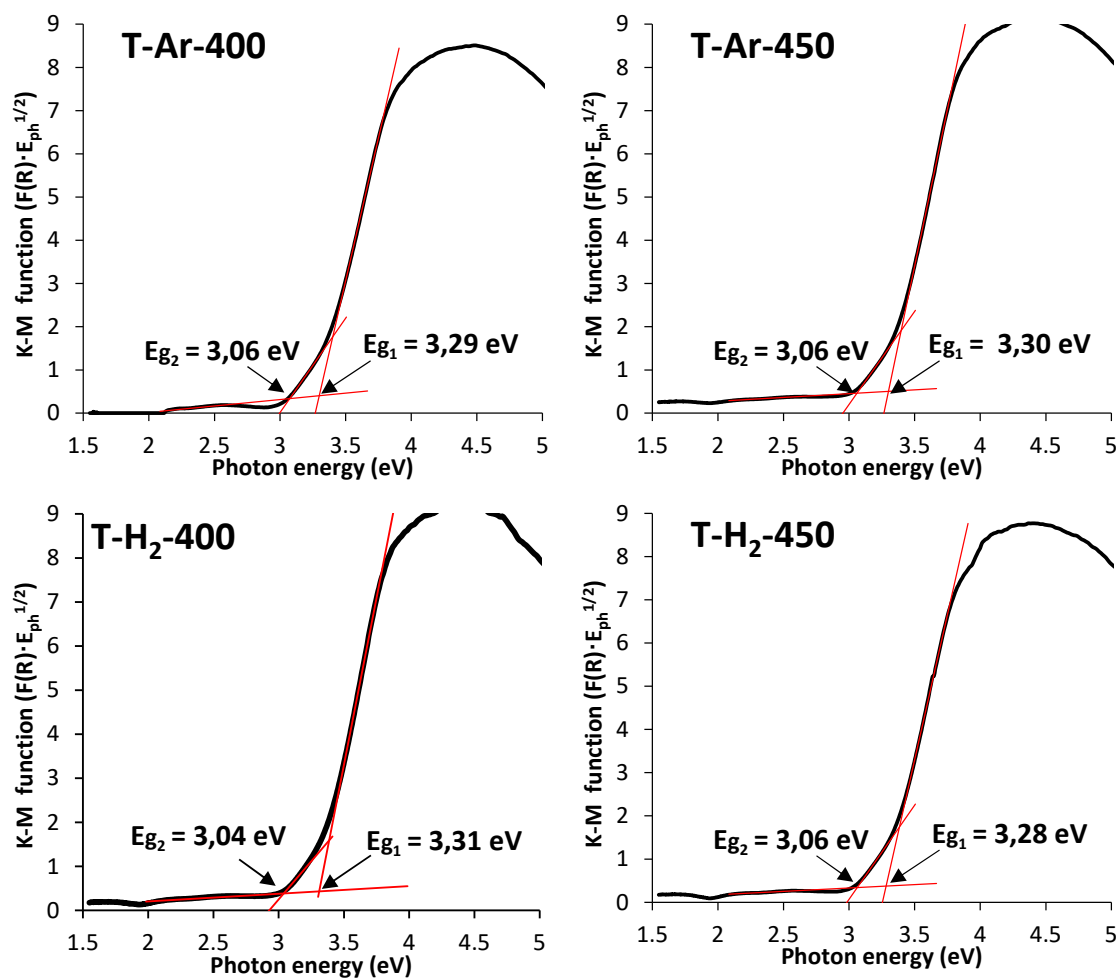

**Figure S2.** Kubelka-Munk graphs for band-gap values determination of TiO<sub>2</sub>-based photocatalysts heat-treated in 400-450 °C
